# Supplementary material for: Overexpression of Kinase-Negative Protein Kinase Cδ in Pancreatic β-Cells Protects Mice From Diet-Induced Glucose Intolerance and β-Cell Dysfunction
Source: PubMed Central journal article supplement — Diabetes. 2009 Oct 13;59(1):119–27. doi: 10.2337/db09-0512 (PMC2797912; doi:10.2337/db09-0512), 2009-10-13
Supplement: supp_db09-0512_dc09-0512_online_appendix.pdf [file supp_db09-0512_dc09-0512_online_appendix.pdf]

**ONLINE APPENDIX**

**Table S1:** Age, diet, body weight, plasma glucose levels and serum insulin concentrations of control and PKC $\delta$ KN over-expressing mice. Details are described in Research Design and Methods.

| mice                                         | control          | PKC $\delta$ KN | control          | PKC $\delta$ KN  | control          | PKC $\delta$ KN   |
|----------------------------------------------|------------------|-----------------|------------------|------------------|------------------|-------------------|
| Age (months)                                 | 1.5              | 1.5             | 9                | 9                | 3                | 3                 |
| Diet                                         | Chow             | Chow            | Chow             | Chow             | HFD              | HFD               |
| Body weight (g)                              | 17.0 $\pm$ 3.0   | 16.0 $\pm$ 1.0  | 44.0 $\pm$ 4.0   | 46.1 $\pm$ 2.0   | 42.0 $\pm$ 2.0   | 44.5 $\pm$ 2.0    |
| Fasted glucose (mg/dl) (#179)                | 96.0 $\pm$ 25.0  | 81.0 $\pm$ 4.0  | 175.0 $\pm$ 19.0 | 137.0 $\pm$ 10.0 | 157.0 $\pm$ 18.0 | 108.0 $\pm$ 4.0*  |
| Fasted glucose (#162)                        | nd               | nd              | 144.0 $\pm$ 4.5  | 135.0 $\pm$ 3.0  | 91.0 $\pm$ 8.6   | 79.5 $\pm$ 7.2    |
| 2 h glucose (#179)                           | 101.0 $\pm$ 18.0 | 100.0 $\pm$ 1.0 | 289.0 $\pm$ 17.0 | 218.0 $\pm$ 28.0 | 310.0 $\pm$ 82.0 | 108.0 $\pm$ 31.0* |
| 2 h glucose (#162)                           | nd               | nd              | 306.0 $\pm$ 11.2 | 267.3 $\pm$ 6.2* | 376.3 $\pm$ 48.8 | 245.8 $\pm$ 42.2  |
|                                              |                  |                 |                  |                  |                  |                   |
| Fasted insulin (ng/ml) (#179)                | 0.22 $\pm$ 0.14  | 0.32 $\pm$ 0.07 | 1.30 $\pm$ 0.20  | 1.00 $\pm$ 0.10  | 0.32 $\pm$ 0.04  | 0.55 $\pm$ 0.12   |
| 2 h insulin (% of basal) (#179) <sup>1</sup> | 75.0 $\pm$ 28.0  | 54.0 $\pm$ 17.0 | 77.0 $\pm$ 25.0  | 130.0 $\pm$ 13.0 | 143.0 $\pm$ 7.0  | 193.0 $\pm$ 18.0* |

<sup>1</sup>glucose load (2g/kg body weight); nd, not determined

\* Significantly different to the respective value of control mice

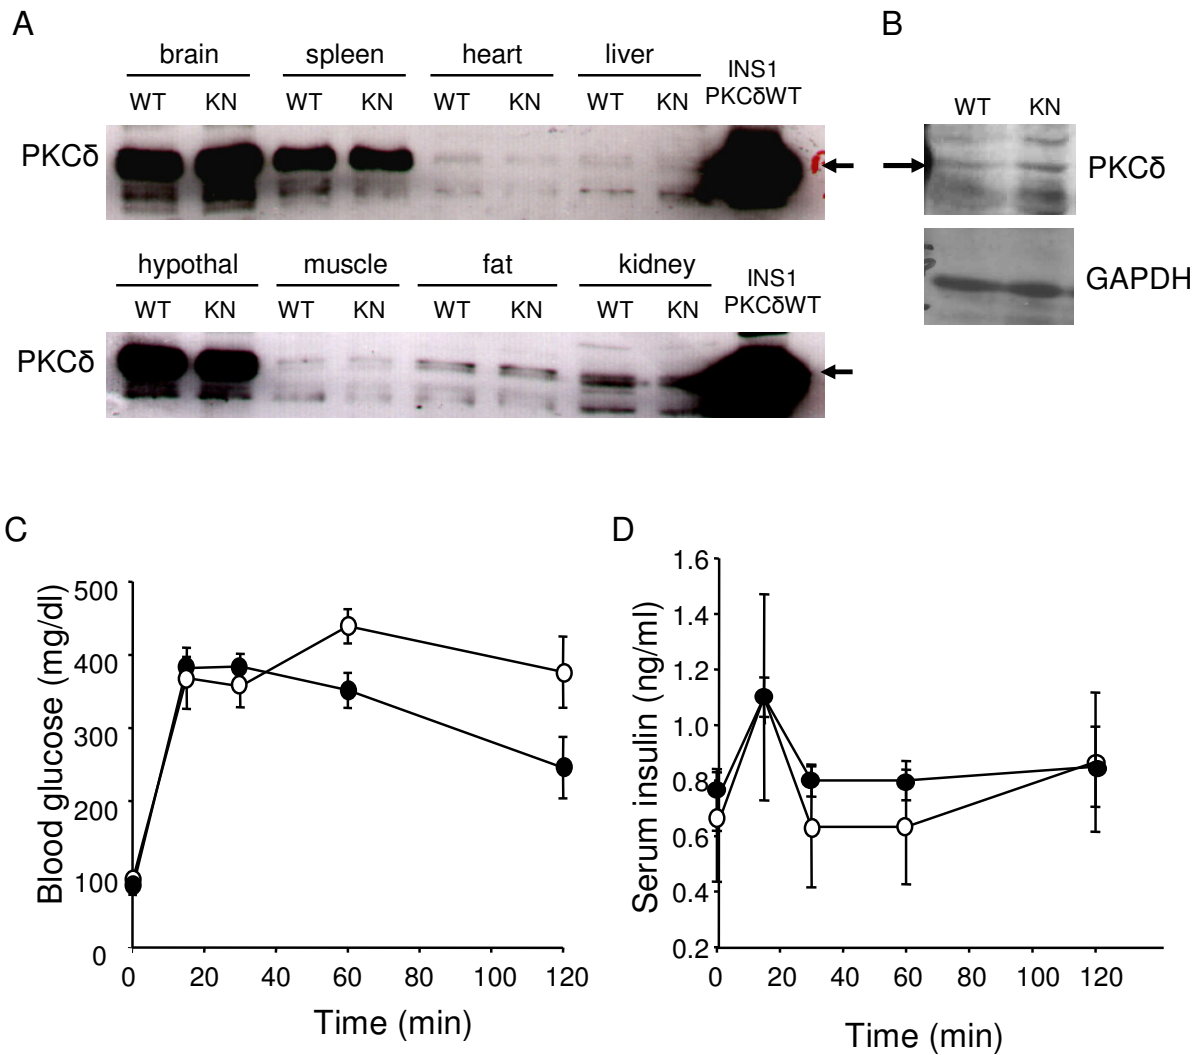

**Fig. S1: Expression of PKCδ in tissues of control (WT) and PKCδKN over-expressing mice and blood glucose and plasma insulin during ipGTT after HFD. (A)** Western blot analysis of tissue homogenates (50 μg of mouse line #162) reveals a high expression of PKCδ in brain, spleen and hypothalamus (hypothal), but a low expression of PKCδ in heart, kidney, liver muscle and fat in both control (WT) and PKCδKN over-expressing mice (KN). As control, INS-1E cells transfected with PKCδWT (15 μg) are shown on the right. **(B)** Western blot of homogenates of isolated islets from control and PKCδKN mice (#162) discloses a low expression of PKCδKN. **(C and D)** Blood glucose and plasma insulin concentrations represented as means ± SEM of control mice (n = 3, white symbols) and of PKCδKN mice (#162, n = 4, black symbols) were measured after intraperitoneally glucose injection (2 g/kg body weight). The transgenic mice (#162) with a low expression of PKCδKN exhibit the tendency to improve glucose homeostasis.

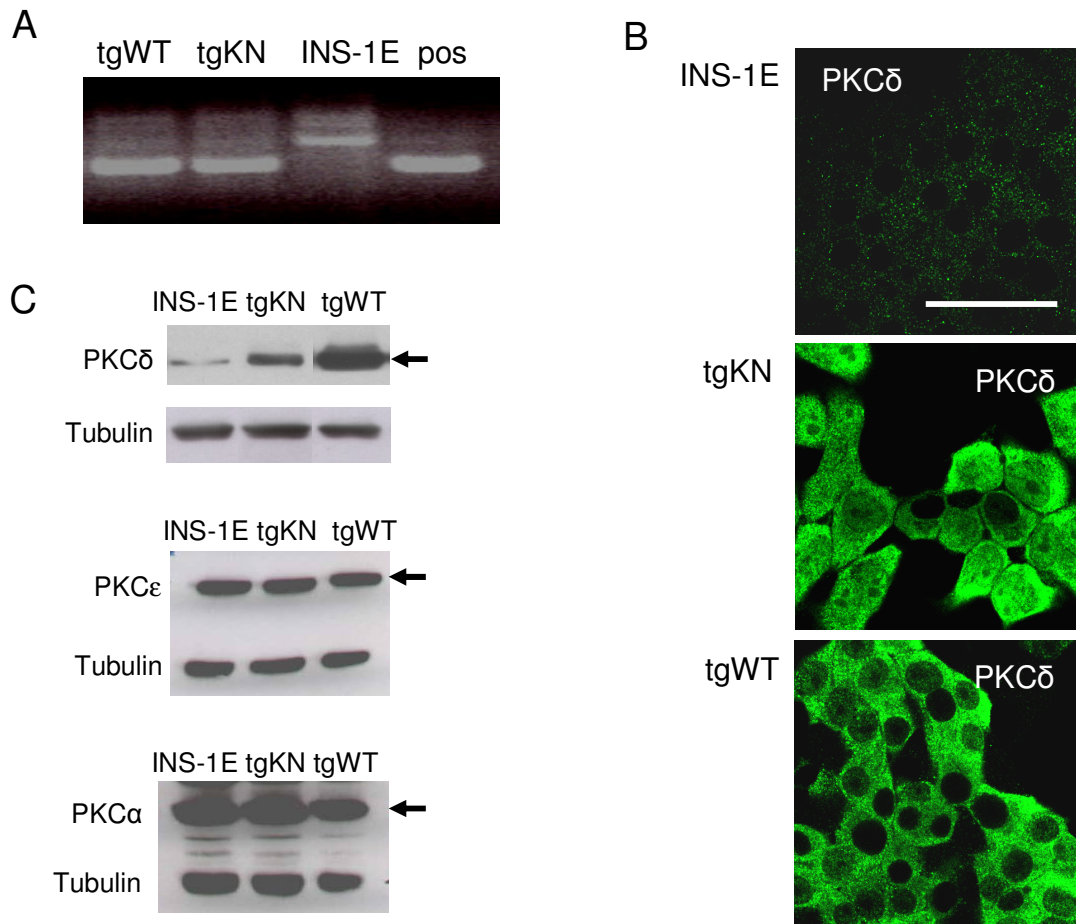

**Fig. S2: INS-1E cells overexpressing PKC $\delta$ WT or PKC $\delta$ KN. (A)** Detection of PKC $\delta$  by PCR in INS-1E cells transfected with the respective DNA for PKC $\delta$  (tgWT) and the mutated PKC $\delta$ KN (tgKN) compared to untransfected INS-1E cells and the positive control (pos). **(B)** Immunohistochemical detection of PKC $\delta$  in control INS-1E cells and INS-1E cells transfected with WT (tgWT) and KN PKC $\delta$  (tgKN). **(C)** Respective Western blots for PKC $\delta$ , PKC $\epsilon$  and PKC $\alpha$  in control INS-1E cells and INS-1E cells transfected with KN PKC $\delta$  (tgKN) and WT PKC $\delta$  (tgWT).

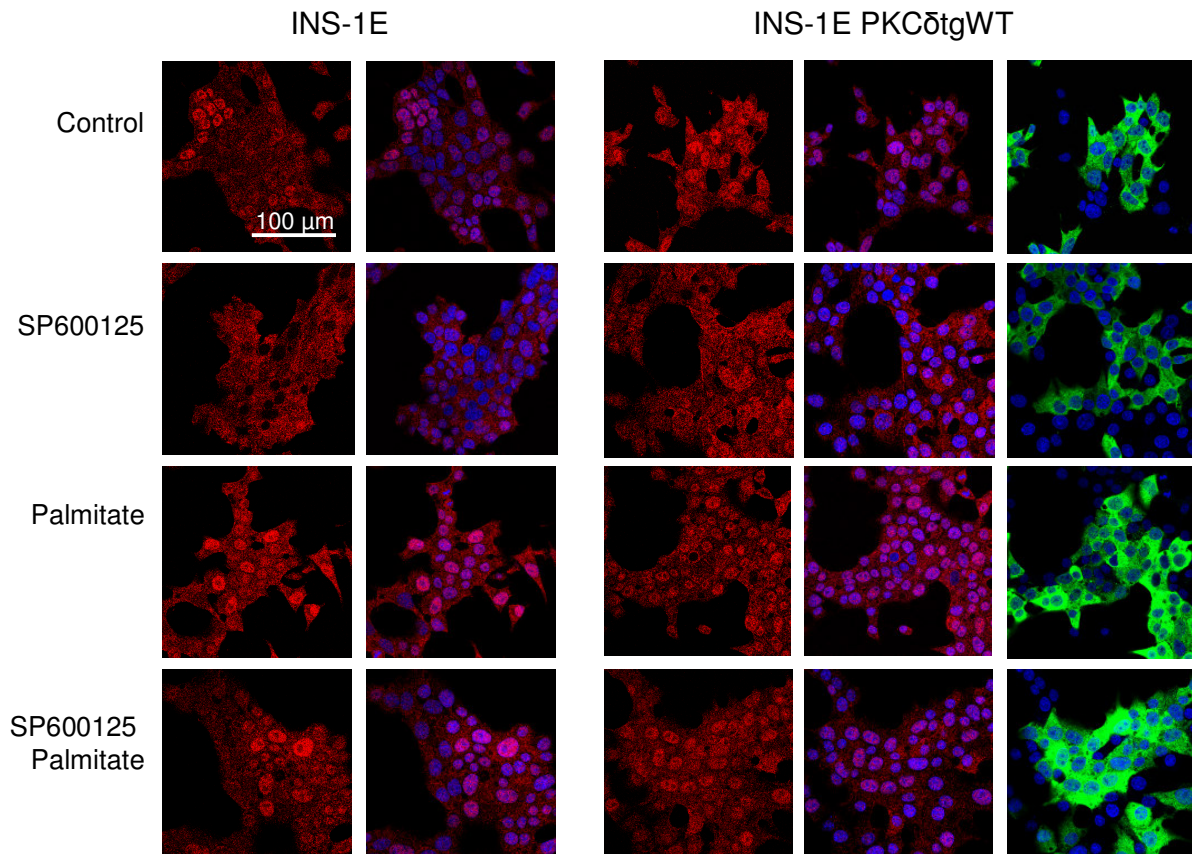

**Fig. S3: Nuclear localization of FoxO1 in INS-1E cells depends on PKCδ expression.** Representative pictures of FoxO1 staining (red), nuclear staining (blue) and PKCδ staining (green) of INS-1E cells and INS-1E cells transfected with PKCδWT after treatment for 1 d with palmitate (0.6 mmol/l) and with JNK inhibitor SP600125 (10 μmol/l) as indicated. The pink colour indicates increased nuclear localization of FoxO1.
